# Supplementary material for: Principal Components Analysis of Population Admixture
Source: PubMed Central journal article supplement (PMC3392282; doi:10.1371/journal.pone.0040115), 2012-07-09
Supplement: pone.0040115.s007.pdf [file pone.0040115.s007.pdf]

## Principal components analysis of population admixture

Jianzhong Ma\*, Christopher I. Amos

Department of Genetics, The University of Texas MD Anderson Cancer Center, Houston, Texas, USA

\* E-mail: jzma@mdanderson.org

Text S1: The variance-covariance parameters of variant allele count in terms of those of allele frequency

Suppose that there are five distinct populations: P1, P2, P3, P4, and P5. P3 and P4 are admixtures of P1 and P2 with proportions  $\alpha:(1-\alpha)$  and  $\beta:(1-\beta)$ , respectively. For a random marker, the variant allele frequencies of P1, P2, and P5,  $p_1$ ,  $p_2$  and  $p_5$ , are random variables with a variance-covariance matrix

$$V_F = \begin{pmatrix} \Sigma_1^2 & \Sigma_{12} & \Sigma_{15} \\ \Sigma_{12} & \Sigma_2^2 & \Sigma_{25} \\ \Sigma_{15} & \Sigma_{25} & \Sigma_5^2 \end{pmatrix}.$$

For P3, consider the probability that the paternal allele is the variant allele, given the allele frequencies of P1 and P2

$$\begin{aligned} P(a_3^{\text{pat}} = 1 | p_1, p_2) &= P(a_3^{\text{pat}} = 1 | \text{ancestry}=\text{P1}, p_1, p_2)P(\text{ancestry}=\text{P1} | p_1, p_2) \\ &\quad + P(a_3^{\text{pat}} = 1 | \text{ancestry}=\text{P2}, p_1, p_2)P(\text{ancestry}=\text{P2} | p_1, p_2) \\ &= p_1\alpha + p_2(1-\alpha). \end{aligned}$$

The same is true for the maternal allele. Assuming random mating, we have the allele frequency of P3

$$p_3 = p_1\alpha + p_2(1-\alpha)$$

and similarly of P4

$$p_4 = p_1\beta + p_2(1-\beta).$$

As in Text S1 of [1], we can show that

$$\begin{aligned} P(C_1) &= \int dp_1 P(C_1 | p_1) P(p_1) \\ P(C_2) &= \int dp_2 P(C_2 | p_2) P(p_2) \\ P(C_5) &= \int dp_5 P(C_5 | p_5) P(p_5) \\ P(C_3) &= \int dp_1 dp_2 P(p_1, p_2) P(C_3 | p_1, p_2) \\ P(C_4) &= \int dp_1 dp_2 P(p_1, p_2) P(C_4 | p_1, p_2) \\ P(C_1, C_2) &= \int dp_1 dp_2 P(p_1, p_2) P(C_1 | p_1) P(C_2 | p_2) \\ P(C_1, C_5) &= \int dp_1 dp_5 P(p_1, p_5) P(C_1 | p_1) P(C_5 | p_5) \\ P(C_2, C_5) &= \int dp_2 dp_5 P(p_2, p_5) P(C_2 | p_2) P(C_5 | p_5) \\ P(C_1, C_3) &= \int dp_1 dp_2 P(p_1, p_2) P(C_1 | p_1) P(C_3 | p_1, p_2) \\ P(C_2, C_3) &= \int dp_1 dp_2 P(p_1, p_2) P(C_2 | p_2) P(C_3 | p_1, p_2) \end{aligned}$$

$$\begin{aligned}
P(C_1, C_4) &= \int dp_1 dp_2 P(p_1, p_2) P(C_1|p_1) P(C_4|p_1, p_2) \\
P(C_2, C_4) &= \int dp_1 dp_2 P(p_1, p_2) P(C_2|p_2) P(C_4|p_1, p_2) \\
P(C_3, C_4) &= \int dp_1 dp_2 P(p_1, p_2) P(C_3|p_1, p_2) P(C_4|p_1, p_2) \\
P(C_3, C_5) &= \int dp_1 dp_2 dp_5 P(p_1, p_2, p_5) P(C_3|p_1, p_2) P(C_5|p_5) \\
P(C_4, C_5) &= \int dp_1 dp_2 dp_5 P(p_1, p_2, p_5) P(C_4|p_1, p_2) P(C_5|p_5),
\end{aligned}$$

where  $C_1, C_2, C_3, C_4$ , and  $C_5$  are the variant allele counts for an individual in P1, P2, P3, P4, and P5, respectively. As an example, here we prove the expression for  $P(C_3, C_4)$ .

$$\begin{aligned}
P(C_3, C_4) &= \int dp_1 dp_2 dp_5 \prod_{i(\neq 3,4)} \sum_{C_i} P(C_1, C_2, \dots | p_1, p_2, p_5) P(p_1, p_2, p_5) \\
&= \int dp_1 dp_2 P(C_3|p_1, p_2) P(C_4|p_1, p_2) \int dp_5 P(p_1, p_2, p_5) \prod_{i(\neq 3,4)} \sum_{C_i} P(C_i|p_1, p_2, p_5) \\
&= \int dp_1 dp_2 P(p_1, p_2) P(C_3|p_1, p_2) P(C_4|p_1, p_2).
\end{aligned}$$

Using these marginal probabilities and Hardy-Weinberg proportion, we can obtain the variance-covariance parameters as follows:

$$\begin{aligned}
\sigma_1^2 &= 2\Sigma_1^2 + 2\bar{p}_1(1 - \bar{p}_1) \\
\sigma_2^2 &= 2\Sigma_2^2 + 2\bar{p}_2(1 - \bar{p}_2) \\
\sigma_5^2 &= 2\Sigma_5^2 + 2\bar{p}_5(1 - \bar{p}_5) \\
\sigma_3^2 &= 2\alpha^2\Sigma_1^2 + 2(1 - \alpha)^2\Sigma_2^2 + 4\alpha(1 - \alpha)\Sigma_{12} + 2[\alpha\bar{p}_1 + (1 - \alpha)\bar{p}_2][1 - \alpha\bar{p}_1 + (1 - \alpha)\bar{p}_2] \\
\sigma_4^2 &= 2\beta^2\Sigma_1^2 + 2(1 - \beta)^2\Sigma_2^2 + 4\beta(1 - \beta)\Sigma_{12} + 2[\beta\bar{p}_1 + (1 - \beta)\bar{p}_2][1 - \beta\bar{p}_1 + (1 - \beta)\bar{p}_2] \\
\sigma_{11} &= 4\Sigma_1^2 \\
\sigma_{22} &= 4\Sigma_2^2 \\
\sigma_{55} &= 4\Sigma_5^2 \\
\sigma_{33} &= 4\alpha^2\Sigma_1^2 + 4(1 - \alpha)^2\Sigma_2^2 + 8\alpha(1 - \alpha)\Sigma_{12} \\
\sigma_{44} &= 4\beta^2\Sigma_1^2 + 4(1 - \beta)^2\Sigma_2^2 + 8\beta(1 - \beta)\Sigma_{12} \\
\sigma_{12} &= 4\Sigma_{12} \\
\sigma_{15} &= 4\Sigma_{15} \\
\sigma_{25} &= 4\Sigma_{25} \\
\sigma_{13} &= 4\alpha\Sigma_1^2 + 4(1 - \alpha)\Sigma_{12} \\
\sigma_{23} &= 4(1 - \alpha)\Sigma_2^2 + 4\alpha\Sigma_{12} \\
\sigma_{14} &= 4\beta\Sigma_1^2 + 4(1 - \beta)\Sigma_{12} \\
\sigma_{24} &= 4(1 - \beta)\Sigma_2^2 + 4\beta\Sigma_{12} \\
\sigma_{35} &= 4\alpha\Sigma_{15} + 4(1 - \alpha)\Sigma_{25} \\
\sigma_{45} &= 4\beta\Sigma_{15} + 4(1 - \beta)\Sigma_{25} \\
\sigma_{34} &= 4\alpha\beta\Sigma_1^2 + 4(1 - \alpha)(1 - \beta)\Sigma_2^2 + 4(\alpha + \beta - 2\alpha\beta)\Sigma_{12}.
\end{aligned}$$

Here, as an example, we prove the expression for  $\sigma_{34}$ . Using Hardy-Weinberg proportion,

$$P(C_3|p_1, p_2) = \begin{cases} (1 - p_3)^2 & (C_3 = 0) \\ 2p_3(1 - p_3) & (C_3 = 1) \\ p_3^2 & (C_3 = 2) \end{cases}$$

and a similar equation for  $P(C_4|p_1, p_2)$ , we have

$$\begin{aligned} \overline{C_3} &= \int dp_1 p_2 \sum_{C_3} P(p_1, p_2) C_3 P(C_3|p_1, p_2) = 2[\alpha \overline{p_1} + (1 - \alpha) \overline{p_2}] \\ \overline{C_4} &= \int dp_1 p_2 \sum_{C_3} P(p_1, p_2) C_3 P(C_3|p_1, p_2) = 2[\beta \overline{p_1} + (1 - \beta) \overline{p_2}] \end{aligned}$$

and

$$\begin{aligned} \overline{C_3 C_4} &= \int dp_1 p_2 P(p_1, p_2) \sum_{C_3} C_3 P(C_3|p_1, p_2) \sum_{C_4} C_4 P(C_4|p_1, p_2) \\ &= \int dp_1 p_2 P(p_1, p_2) 2p_3 2p_4 \\ &= 4\alpha\beta \overline{p_1^2} + 4(1 - \alpha)(1 - \beta) \overline{p_2^2} + 4(\alpha + \beta - 2\alpha\beta) \overline{p_1 p_2}, \end{aligned}$$

and hence

$$\sigma_{34} \equiv \overline{C_3 C_4} - \overline{C_3} \overline{C_4} = 4\alpha\beta \Sigma_1^2 + 4(1 - \alpha)(1 - \beta) \Sigma_2^2 + 4(\alpha + \beta - 2\alpha\beta) \Sigma_{12}.$$

These results can be generalized to the case where there are multiple ancestral populations. Suppose that we have six populations, P1, P2, P3, P4, P5, and P6, among which P4 and P5 are admixed populations of P1, P2, and P3 with proportions  $\alpha_1:\alpha_2:(1 - \alpha_1 - \alpha_2)$  and  $\beta_1:\beta_2:(1 - \beta_1 - \beta_2)$ , respectively. The expressions that are different from those in the two-ancestry case are as follows:

$$\begin{aligned} \sigma_4^2 &= 2\alpha_1^2 \Sigma_1^2 + 2\alpha_2^2 \Sigma_2^2 + 2(1 - \alpha_1 - \alpha_2)^2 \Sigma_3^2 + 4\alpha_1 \alpha_2 \Sigma_{12} \\ &\quad + 4\alpha_1(1 - \alpha_1 - \alpha_2) \Sigma_{13} + 4\alpha_2(1 - \alpha_1 - \alpha_2) \Sigma_{23} + 2\overline{p_4}(1 - \overline{p_4}) \\ \sigma_{44} &= 4\alpha_1^2 \Sigma_1^2 + 4\alpha_2^2 \Sigma_2^2 + 4(1 - \alpha_1 - \alpha_2)^2 \Sigma_3^2 \\ &\quad + 8\alpha_1 \alpha_2 \Sigma_{12} + 8\alpha_1(1 - \alpha_1 - \alpha_2) \Sigma_{13} + 8\alpha_2(1 - \alpha_1 - \alpha_2) \Sigma_{23} \\ \sigma_{14} &= 4\alpha_1 \Sigma_1^2 + 4\alpha_2 \Sigma_{12} + 4(1 - \alpha_1 - \alpha_2) \Sigma_{13} \\ \sigma_{24} &= 4\alpha_2 \Sigma_2^2 + 4\alpha_1 \Sigma_{12} + 4(1 - \alpha_1 - \alpha_2) \Sigma_{23} \\ \sigma_{34} &= 4(1 - \alpha_1 - \alpha_2) \Sigma_3^2 + 4\alpha_1 \Sigma_{13} + 4\alpha_2 \Sigma_{23} \\ \sigma_{45} &= 4\alpha_1 \beta_1 \Sigma_1^2 + 4\alpha_2 \beta_2 \Sigma_2^2 + 4(1 - \alpha_1 - \alpha_2)(1 - \beta_1 - \beta_2) \Sigma_3^3 + 4(\alpha_1 \beta_2 + \alpha_2 \beta_1) \Sigma_{12} \\ &\quad + 4(\alpha_1 + \beta_1 - 2\alpha_1 \beta_1 - \alpha_1 \beta_2 - \alpha_2 \beta_1) \Sigma_{13} + 4(\alpha_2 + \beta_2 - 2\alpha_2 \beta_2 - \alpha_1 \beta_2 - \alpha_2 \beta_1) \Sigma_{23} \\ \sigma_{46} &= 4\alpha_1 \Sigma_{15} + 4\alpha_2 \Sigma_{26} + 4(1 - \alpha_1 - \alpha_2) \Sigma_{36}. \end{aligned}$$

The expressions for  $\sigma_5^2$ ,  $\sigma_{55}$ ,  $\sigma_{15}$ ,  $\sigma_{25}$ ,  $\sigma_{35}$ , and  $\sigma_{56}$  are the same as those for  $\sigma_4^2$ ,  $\sigma_{44}$ ,  $\sigma_{14}$ ,  $\sigma_{24}$ ,  $\sigma_{34}$  and  $\sigma_{46}$ , respectively, except that the  $\alpha$ s are replaced by the corresponding  $\beta$ s.

## References

1. Ma J, Amos C (2010) Theoretical formulation of principal components analysis to detect and correct for population stratification. PLoS ONE 5: e12510.
