# Supplementary material for: Principal Components Analysis of Population Admixture
Source: PubMed Central journal article supplement (PMC3392282; doi:10.1371/journal.pone.0040115), 2012-07-09
Supplement: pone.0040115.s008.pdf [file pone.0040115.s008.pdf]

## Principal components analysis of population admixture

Jianzhong Ma\*, Christopher I. Amos

Department of Genetics, The University of Texas MD Anderson Cancer Center, Houston, Texas, USA

\* E-mail: jzma@mdanderson.org

### Text S2: Inferring admixture proportions from the asymptotic pattern of the eigenvector-plot: two-way admixture

If there are three populations,  $K = 3$ , the reduced eigenequation

$$\begin{pmatrix} -(N_2\sigma'_{12} + N_3\sigma'_{13}) & N_2\sigma'_{12} & N_3\sigma'_{13} \\ N_1\sigma'_{12} & -(N_1\sigma'_{12} + N_3\sigma'_{23}) & N_3\sigma'_{23} \\ N_1\sigma'_{13} & N_2\sigma'_{23} & -(N_1\sigma'_{13} + N_2\sigma'_{23}) \end{pmatrix} \begin{pmatrix} x_1 \\ x_2 \\ x_3 \end{pmatrix} = \lambda \begin{pmatrix} x_1 \\ x_2 \\ x_3 \end{pmatrix}$$

can be analytically solved. In addition to the trivial solution

$$\lambda_1 = 0, \quad (x_1, x_2, x_3) = \frac{1}{\sqrt{N_1 + N_2 + N_3}}(1, 1, 1),$$

there are two more solutions, of which the eigenvalues are the solutions of

$$\lambda^2 + \lambda[(N_1 + N_2)\sigma'_{12} + (N_1 + N_3)\sigma'_{13} + (N_2 + N_3)\sigma'_{23}] + [N_1\sigma'_{12}\sigma'_{13} + N_2\sigma'_{12}\sigma'_{23} + N_3\sigma'_{13}\sigma'_{23}](N_1 + N_2 + N_3) = 0.$$

In the asymptotic limit ( $N \rightarrow \infty$ ), the reduced eigenequation is

$$N \begin{pmatrix} -(n_1\hat{\sigma}_{12} + n_2\hat{\sigma}_{13}) & n_2\hat{\sigma}_{12} & n_3\hat{\sigma}_{13} \\ n_1\hat{\sigma}_{12} & -(n_1\hat{\sigma}_{12} + n_2\hat{\sigma}_{23}) & n_3\hat{\sigma}_{23} \\ n_1\hat{\sigma}_{13} & n_2\hat{\sigma}_{23} & -(n_1\hat{\sigma}_{13} + n_2\hat{\sigma}_{23}) \end{pmatrix} \begin{pmatrix} x_1 \\ x_2 \\ x_3 \end{pmatrix} = \lambda^* \begin{pmatrix} x_1 \\ x_2 \\ x_3 \end{pmatrix}.$$

The two eigenvalues then are determined by

$$\left(\frac{\lambda^*}{N}\right)^2 + \left(\frac{\lambda^*}{N}\right)[(n_1 + n_2)\hat{\sigma}_{12} + (n_1 + n_3)\hat{\sigma}_{13} + (n_2 + n_3)\hat{\sigma}_{23}] + [n_1\hat{\sigma}_{12}\hat{\sigma}_{13} + n_2\hat{\sigma}_{12}\hat{\sigma}_{23} + n_3\hat{\sigma}_{13}\hat{\sigma}_{23}] = 0.$$

The coefficients of this equation is independent of  $N$ , and hence its solutions are linear functions of  $N$ .

Now suppose that population P3 is an admixed population of the other two populations, P1 and P2, with admixture proportions  $\alpha:(1 - \alpha)$ . Using the expressions derived in Text S1, we have, after tedious algebra,

$$\begin{aligned} \hat{\sigma}_{12} &= -4[n_1 + \alpha n_3][n_2 + (1 - \alpha)n_3] [\Sigma_1^2 + \Sigma_2^2 - 2\Sigma_{12}] \\ \hat{\sigma}_{13} &= 4[n_2 + (1 - \alpha)n_3][\alpha n_2 - (1 - \alpha)n_1] [\Sigma_1^2 + \Sigma_2^2 - 2\Sigma_{12}] \\ \hat{\sigma}_{23} &= -4[n_1 + \alpha n_3][\alpha n_2 - (1 - \alpha)n_1] [\Sigma_1^2 + \Sigma_2^2 - 2\Sigma_{12}]. \end{aligned}$$

These expressions lead to an important sum-rule

$$n_1\hat{\sigma}_{12}\hat{\sigma}_{13} + n_2\hat{\sigma}_{12}\hat{\sigma}_{23} + n_3\hat{\sigma}_{13}\hat{\sigma}_{23} = 0.$$

The two asymptotic eigenvalues are now

$$\begin{aligned} \lambda_1^* &= -N[(n_1 + n_2)\hat{\sigma}_{12} + (n_1 + n_3)\hat{\sigma}_{13} + (n_2 + n_3)\hat{\sigma}_{23}] \\ \lambda_2^* &= 0. \end{aligned}$$

Substituting the non-zero eigenvalue,  $\lambda_1^*$ , into the eigenequation, we find that the eigenvector satisfies

$$x_1 a = x_2 b = x_3 c,$$

where

$$\begin{aligned} a &= -\lambda_1^* \hat{\sigma}_{23} \\ b &= -\lambda_1^* \hat{\sigma}_{13} \\ c &= -\lambda_1^* \hat{\sigma}_{12}. \end{aligned}$$

Hence, up to a normalization constant, the eigenvector is

$$\begin{pmatrix} x_1 \\ x_2 \\ x_3 \end{pmatrix} = \begin{pmatrix} -[n_2 + (1 - \alpha)n_3] \\ [n_1 + \alpha n_3] \\ -[\alpha n_2 - (1 - \alpha)n_1] \end{pmatrix}.$$

Finally, we have

$$\begin{aligned} \frac{x_3 - x_1}{x_2 - x_1} &= 1 - \alpha \\ \frac{x_2 - x_3}{x_2 - x_1} &= \alpha. \end{aligned}$$

For the other eigenvalue,  $\lambda_2^* = 0$ , the corresponding eigenvector,  $(X_1, X_2, X_3)^T$ , can be obtained as follows. It must be orthogonal with  $(1, 1, 1)$ , the first eigenvector:

$$n_1 X_1 + n_2 X_2 + n_3 X_3 = 0,$$

and with the one corresponding to  $\lambda_1^*$

$$n_1 x_1 X_1 + n_2 x_2 X_2 + n_3 x_3 X_3 = 0.$$

This leads to the expression of the eigenvector:

$$\begin{pmatrix} X_1 \\ X_2 \\ X_3 \end{pmatrix} = \begin{pmatrix} \alpha n_2 n_3 \\ (1 - \alpha) n_1 n_3 \\ -n_1 n_2 \end{pmatrix}.$$
